# Supplementary material
Source: Royal Society of Chemistry journal article supplement (doi:10.1039/d6gc00414h)
Supplement: d6gc00414h1.pdf [file d6gc00414h1.pdf]

## Supporting Information

### Tandem and mild synthesis of symmetric secondary alcohol toward ionizable lipid analogue to DLin-MC3-DMA

Siyu Pan, Demeng Liu, Delong Hou\*, Qi Zeng, Jun Yan, Yi Chen\*

*College of Biomass Science and Engineering, Sichuan University, Chengdu 610065, P.R. China*

\* Corresponding author. *E-mail address:* chenyi\_leon@scu.edu.cn (Y. Chen);  
houdelong@scu.edu.cn (D. Hou)

#### Table of Contents

|                                                                                                                     |     |
|---------------------------------------------------------------------------------------------------------------------|-----|
| <b>Figure S1.</b> NMR spectra of methyl linoleate and secondary alcohol.....                                        | S2  |
| <b>Table S1.</b> Screening of Lewis acid/base pairs .....                                                           | S3  |
| <b>Table S2.</b> Screening of conditions for the solvent-free self-Claisen condensation of methyl linoleate . ..... | S4  |
| <b>Figure S2.</b> Isosurface diagram of Fukui function for solvents .....                                           | S5  |
| <b>Figure S3.</b> NMR spectra of the tandem reaction intermediates.....                                             | S6  |
| <b>Table S3.</b> Mass balance for calculating the E-factor of the tandem process .....                              | S7  |
| <b>Table S4.</b> Mass balance for calculating the E-factor of the Grignard-based route .....                        | S8  |
| <b>Figure S4.</b> NMR spectra of DLin-MC3-DMA.....                                                                  | S9  |
| <b>Figure S5.</b> ESI mass spectrum of CLin-17.....                                                                 | S10 |
| <b>Figure S6.</b> <i>In vitro</i> cytotoxicity of CLin-17 and DLin-MC3-DMA .....                                    | S11 |

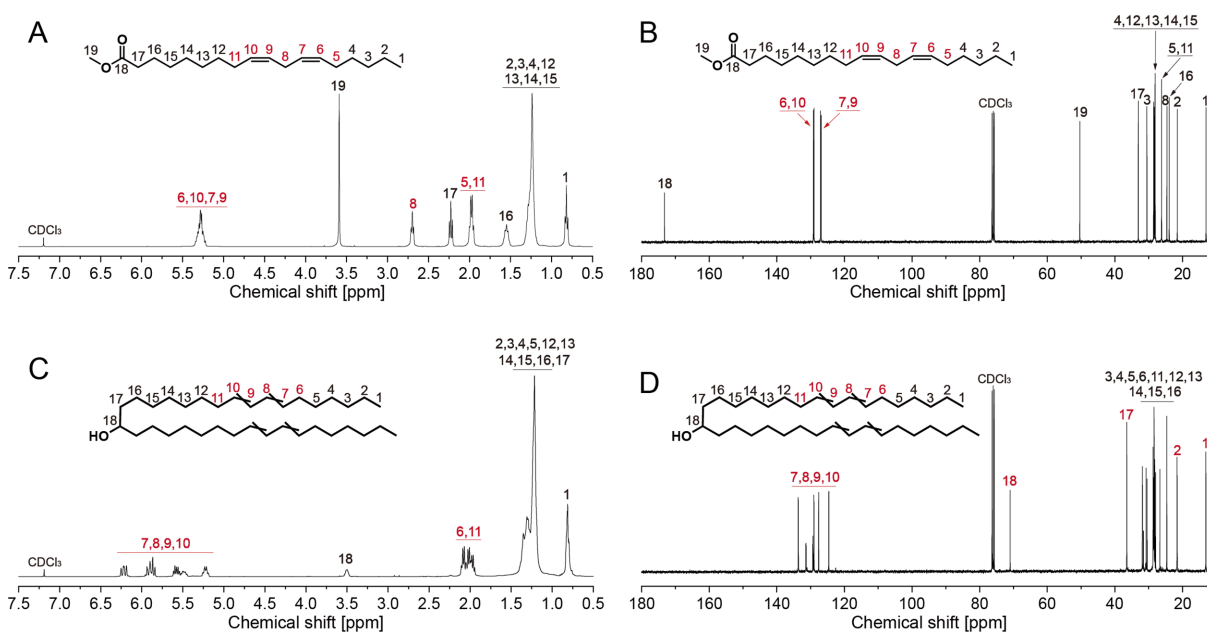

**Figure S1.** NMR spectra of methyl linoleate and secondary alcohol (A)  $^1\text{H}$  and (B)  $^{13}\text{C}$  NMR spectra of methyl linoleate. (C)  $^1\text{H}$  and (D)  $^{13}\text{C}$  NMR spectra of the secondary alcohol obtained from three-step reaction. First, Claisen condensation reaction mediated by the classical strong base sodium hydride using methyl linoleate as feedstock; subsequent hydrolysis and reduction achieved secondary alcohol.

**Table S1.** Screening of Lewis acid/base pairs for the self-condensation of methyl linoleate<sup>a</sup>.

| Entry | Lewis acid        | Base                  | Solvent            | yield <sup>b</sup> (%) |
|-------|-------------------|-----------------------|--------------------|------------------------|
| 1     | TiCl <sub>4</sub> | TEA                   | Toluene            | 57                     |
| 2     | SnCl <sub>4</sub> | TEA                   | Toluene            | 0                      |
| 3     | TiCl <sub>4</sub> | TEA                   | DCM                | 61                     |
| 4     | SnCl <sub>4</sub> | TEA                   | DCM                | 0                      |
| 5     | TiCl <sub>4</sub> | Diisopropylethylamine | DCM                | 54                     |
| 6     | TiCl <sub>4</sub> | Imidazole             | DCM                | Trace                  |
| 7     | TiCl <sub>4</sub> | Tributylamine         | DCM                | 55                     |
| 8     | TiCl <sub>4</sub> | TEA                   | THF                | 0                      |
| 9     | TiCl <sub>4</sub> | TEA                   | Ether              | 19                     |
| 10    | TiCl <sub>4</sub> | TEA                   | 1,2-Dichloroethane | 47                     |

<sup>a</sup> The Lewis acid (10 mmol) in solvent (30 ml) was added dropwise over a period of 60 min to a solution of methyl linoleate (10 mmol) and base (20 mmol) at 20 °C, followed by 1 h of reaction. <sup>b</sup> Isolated yield of β-ketoester.

**Table S2.** Screening of conditions for the solvent-free self-Claisen condensation of methyl linoleate.<sup>a</sup>

| Entry | TiCl <sub>4</sub><br>(eq.) | TEA<br>(eq.) | Time <sup>b</sup><br>(min) | Temperature<br>(°C) | Conversion <sup>c</sup><br>(%) | Yield <sup>d</sup><br>(%) |
|-------|----------------------------|--------------|----------------------------|---------------------|--------------------------------|---------------------------|
| 1     | 2                          | 4            | 60                         | 20                  | 90                             | 34                        |
| 2     | 1.5                        | 3            | 60                         | 20                  | 88                             | 37                        |
| 3     | 1                          | 1.5          | 60                         | 20                  | 65                             | 45                        |
| 4     | 1                          | 1.5          | 80                         | 20                  | 70                             | 53                        |
| 5     | 1                          | 1.5          | 100                        | 20                  | 69                             | 52                        |
| 6     | 1                          | 1.5          | 100                        | -20                 | 55                             | 43                        |

<sup>a</sup> General procedure: TiCl<sub>4</sub> was added dropwise to a mixture of TEA and methyl linoleate. The reaction was stirred for another 1 h after complete addition, where methyl linoleate was used as 1 equivalent (eq). <sup>b</sup> The time taken for the dropwise addition of TiCl<sub>4</sub> into the mixture of TEA and methyl linoleate. <sup>c</sup> Conversion of methyl linoleate; determined by recovery. <sup>d</sup> Isolated yield of  $\beta$ -ketoester.

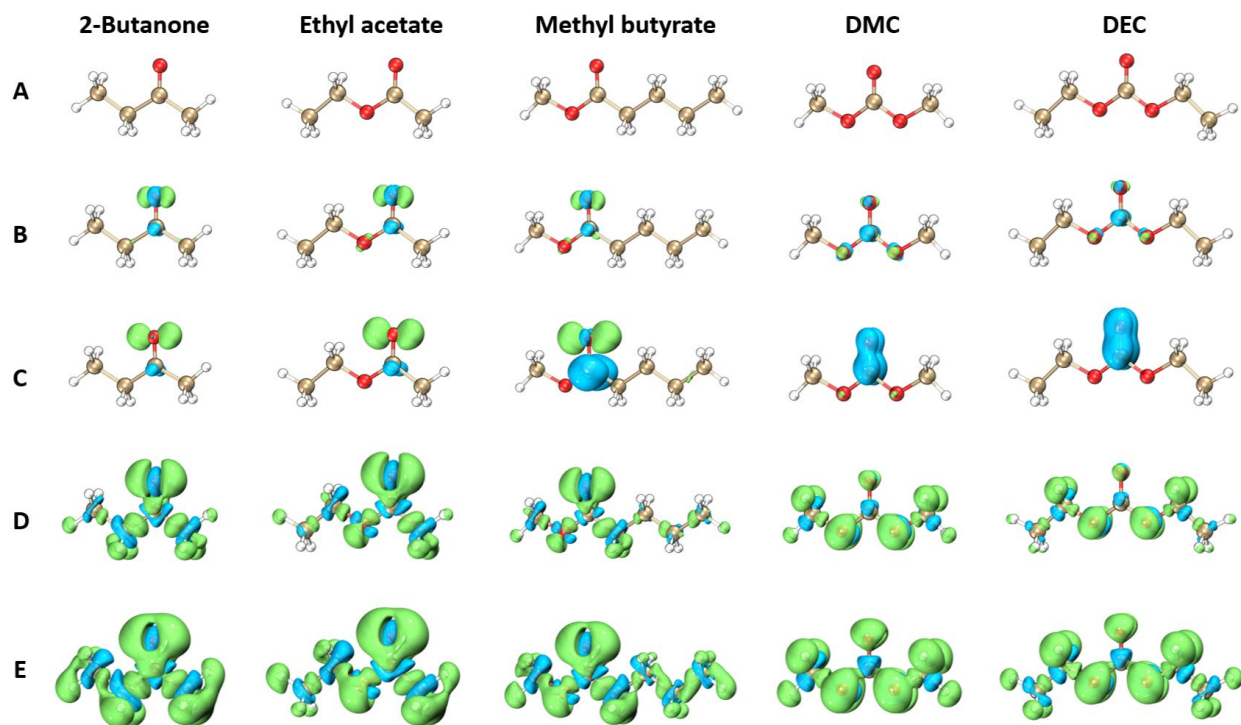

**Figure S2.** Isosurface diagram of Fukui function for solvents. (A) Molecular structure diagram of the different solvent. (B) Dual descriptor (isosurface = -0.03), (C) dual descriptor potential (isosurface = -0.08), (D) Fukui function  $f^{\cdot}$  (isosurface = 0.05) and (E) Local softness  $s^{-}$  (isosurface = 0.05) of the different solvent. All calculations were produced at the B3LYP/6-31G++ (d,p) level. The blue area represents the electrophilic region susceptible to enolate anion attack.

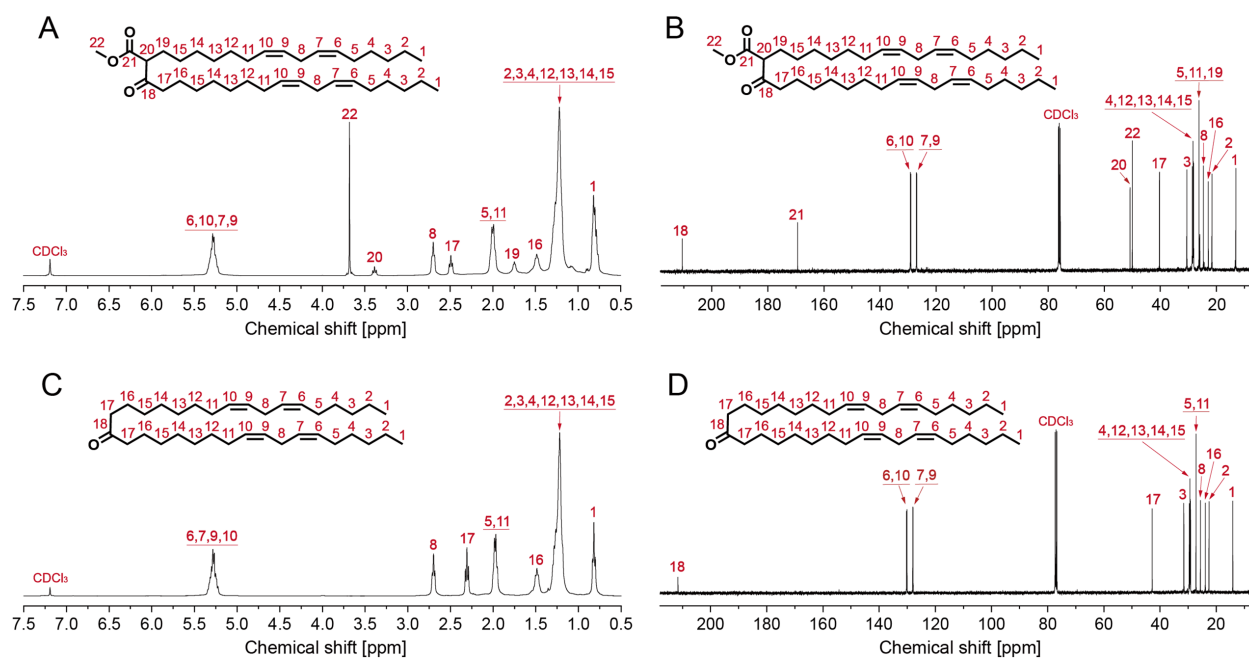

**Figure S3.** NMR spectra of the tandem reaction intermediates. (A)  $^1\text{H}$  and (B)  $^{13}\text{C}$  NMR spectra of the  $\beta$ -ketoester intermediate obtained from the Claisen condensation; (C)  $^1\text{H}$  and (D)  $^{13}\text{C}$  NMR spectra of the ketone intermediate obtained after hydrolysis.

**Table S3.** Mass balance for calculating the E-factor of the tandem process present in this work.<sup>a</sup>

| Material                    | Role                 | Amount (g) |
|-----------------------------|----------------------|------------|
| Methyl linoleate            | Feedstock            | 40         |
| TEA                         | Reagent              | 23.3       |
| DEC                         | Solvent              | 64         |
| TiCl <sub>4</sub>           | Condensation Reagent | 33.5       |
| Ethanol                     | Solvent              | 550        |
| NaOH                        | Hydrolysis reagent   | 32         |
| NaBH <sub>4</sub>           | Reduction reagent    | 15         |
| NH <sub>4</sub> Cl          | Quenching reagent    | 27         |
| Petroleum ether             | Extraction solvent   | 160        |
| Silica gel                  | Chromatography       | 130        |
| Ethyl acetate and hexane    | Chromatography       | 1800       |
| Symmetric secondary alcohol | Product              | 29.2       |

E-factor for the tandem synthesis of symmetric secondary alcohol was performed according to the following equation:

$$E\text{-factor} = \frac{m_{\text{total waste}} - m_{\text{product}}}{m_{\text{product}}} = 98$$

**Table S4.** Mass balance for calculating the E-factor of the Grignard-based route.<sup>a</sup>

| Step | Material                       | Role                 | Amount (g) |
|------|--------------------------------|----------------------|------------|
| 1    | Linoleyl alcohol               | Feedstock            | 40         |
| 1    | DCM                            | Solvent              | 720        |
| 1    | TEA                            | Reagent              | 19.7       |
| 1    | Mesyl chloride                 | Reagent              | 18.9       |
| 1    | NaHCO <sub>3</sub>             | Washing              | 27.1       |
| 1    | NaCl                           | Washing              | 52.6       |
| 1    | Silica gel                     | Chromatography       | 150        |
| 1    | Hexane/Et <sub>2</sub> O       | Chromatography       | 3000       |
| 2    | mesylate                       | Intermediate product | 43.1       |
| 2    | Et <sub>2</sub> O              | Solvent              | 2275       |
| 2    | MgBr.Et <sub>2</sub> O         | Reagent              | 105        |
| 2    | K <sub>2</sub> CO <sub>3</sub> | Washing              | 3.4        |
| 2    | NaCl                           | Washing              | 120        |
| 2    | Silica gel                     | Chromatography       | 150        |
| 2    | Hexane/Et <sub>2</sub> O       | Chromatography       | 3000       |
| 3    | Bromide                        | Intermediate product | 43.1       |
| 3    | Magnesium                      | Reagent              | 3.9        |
| 3    | Et <sub>2</sub> O              | Solvent              | 697        |
| 3    | Ethyl formate                  | Reagent              | 4.4        |
| 3    | Acetone                        | Quenching            | 13         |
| 3    | H <sub>2</sub> SO <sub>4</sub> | Acidification        | 54         |
| 4    | Sodium                         | Reagent              | 1.6        |
| 4    | Methanol                       | Reagent              | 257.6      |
| 4    | Hydrochloric acid              | Acidification        | 7.5        |
| 4    | NaCl                           | Washing              | 57         |
| 4    | Silica gel                     | Chromatography       | 150        |
| 4    | Hexane/Et <sub>2</sub> O       | Chromatography       | 3000       |
| 4    | DLin-MeOH                      | Product              | 26.7       |

<sup>a</sup> Determined by using the minimum practical amounts for these procedures, as these data were not available in the original literature.

E-factor for the Grignard-based route to synthesize DLin-MeOH was performed according to the following equation:

$$E\text{-factor} = \frac{m_{\text{total waste}} - m_{\text{product}}}{m_{\text{product}}} = 524$$

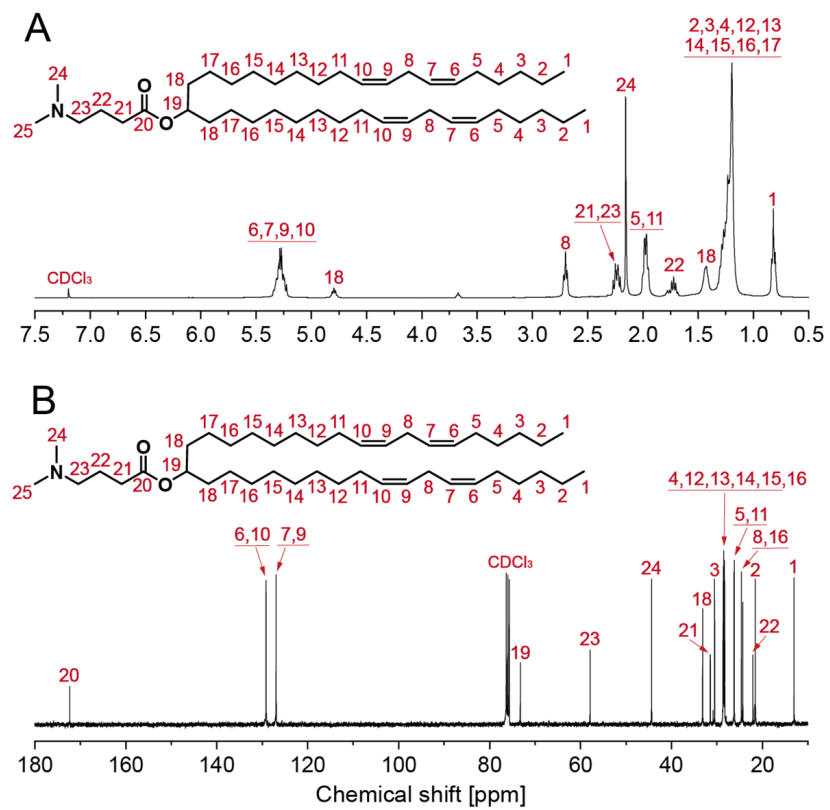

**Figure S4.** (A)  $^1\text{H}$  and (B)  $^{13}\text{C}$  NMR spectra of DLin-MC3-DMA.

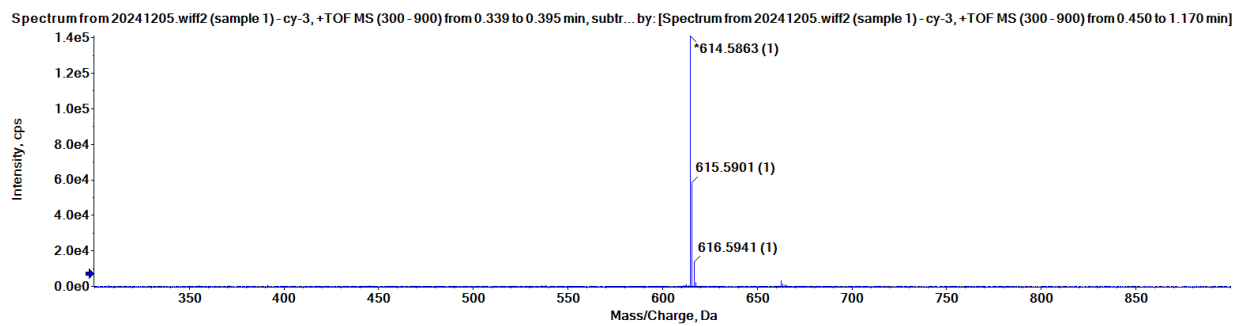

**Figure S5.** ESI mass spectrum of CLin-17.

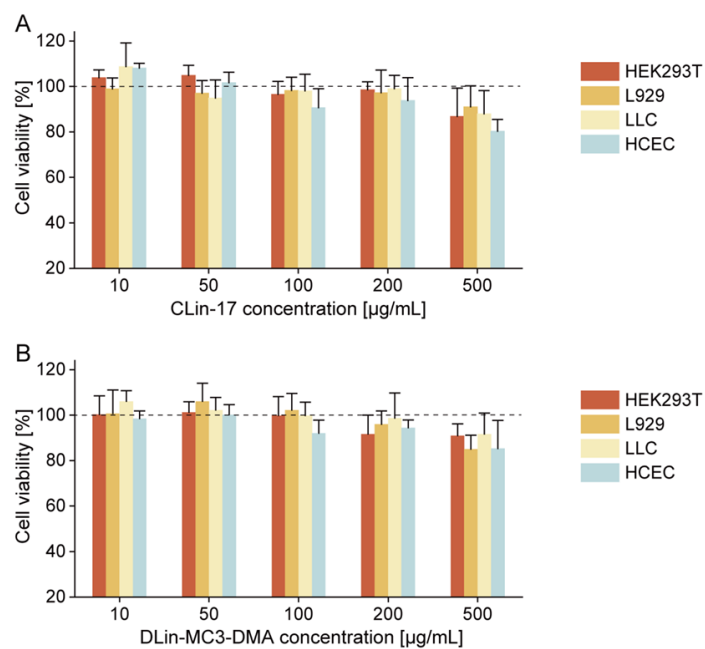

**Figure S6.** *In vitro* cytotoxicity of (A) CLin-17 and (B) DLin-MC3-DMA measured by CCK8 assay. Data were presented as mean  $\pm$  S.D. of biological replicates (n = 5).
